# Supplementary material for: Stuck in the mud: experimental taphonomy and computed tomography demonstrate the critical role of sediment in three-dimensional carcass stabilization during early fossil diagenesis
Source: Research Square preprint supplement (doi:10.21203/rs.3.rs-3192621/v1), 2023-08-07
Supplement: Supplementary file 1 [file 1f840e6a8ca4059a0d4a30a8.xlsx]

## Sheet: Scans
Week	Vial A	Vial B	Vial C	Vial D	Vial E
1	✓	x	x	x	x
2	✓	✓	✓	✓	✓
3	✓	✓	✓	✓	✓
4	✓	✓	✓	✓	✓
5	✓	✓	✓	✓	✓
12	✓	✓	✓	✓	✓
13	discarded	discarded	discarded	discarded	discarded
14	discarded	discarded	discarded	discarded	discarded
16	✓	✓	x	x	x
19	✓	✓	✓	✓	x
20	✓	✓	✓	✓	✓
21	✓	✓	✓	✓	✓
27	✓	✓	✓	✓	✓
31	✓	✓	✓	✓	✓
42	✓	✓	✓	✓	✓
64	✓	✓	✓	opened	✓
	✓- vial scanned	x- vial not scanned

## Sheet: Morphology
eyes	Week	Vial A	Vial B	Vial C	Vial D	Vial E
	1	✓	n/a	n/a	n/a	n/a
	2	✓	✓	✓	✓	✓
	3	✓	✓	✓	✓	✓
	4	✓	✓	✓	✓	✓
	5	✓	✓	✓	✓	✓
	12	✓	✓	✓	✓	✓
	13	discarded	discarded	discarded	discarded	discarded
	14	discarded	discarded	discarded	discarded	discarded
	16	✓	✓	n/a	n/a	n/a
	19	✓	✓	✓	✓	n/a
	20	✓	✓	✓	✓	✓
	21	✓	✓	✓	✓	✓
	27	✓	✓	✓	✓	✓
	31	✓	✓	✓	✓	✓
	42	✓	✓	✓	✓	✓
	64	✓	✓	✓	n/a	✓
appendages	Week	Vial A	Vial B	Vial C	Vial D	Vial E
	1	✓	n/a	n/a	n/a	n/a
	2	✓	✓	✓	✓	✓
	3	✓	✓	✓	✓	✓
	4	✓	✓	✓	✓	✓
	5	✓	✓	✓	✓	✓
	12	✓	✓	✓	✓	✓
	13	discarded	discarded	discarded	discarded	discarded
	14	discarded	discarded	discarded	discarded	discarded
	16	✓	✓	n/a	n/a	n/a
	19	✓	✓	✓	✓	n/a
	20	✓	✓	✓	✓	✓
	21	✓	✓	✓	✓	✓
	27	✓	✓	✓	✓	✓
	31	✓	✓	✓	✓	✓
	42	✓	✓	✓	✓	✓
	64	✓	✓	✓	n/a	✓
carapace	Week	Vial A	Vial B	Vial C	Vial D	Vial E
	1	✓	n/a	n/a	n/a	n/a
	2	✓	✓	✓	✓	✓
	3	✓	✓	✓	✓	✓
	4	✓	✓	✓	✓	✓
	5	✓	✓	✓	✓	✓
	12	✓	✓	✓	✓	✓
	13	discarded	discarded	discarded	discarded	discarded
	14	discarded	discarded	discarded	discarded	discarded
	16	✓	✓	n/a	n/a	n/a
	19	✓	✓	✓	✓	n/a
	20	✓	✓	✓	✓	✓
	21	✓	✓	✓	✓	✓
	27	✓	✓	✓	✓	✓
	31	✓	✓	✓	✓	✓
	42	✓	✓	✓	✓	✓
	64	✓	✓	✓	n/a	✓
caudal furcae	Week	Vial A	Vial B	Vial C	Vial D	Vial E
	1	✓	n/a	n/a	n/a	n/a
	2	✓	✓	✓	✓	✓
	3	✓	✓	✓	✓	✓
	4	✓	✓	✓	✓	✓
	5	✓	✓	✓	✓	✓
	12	✓	✓	✓	✓	✓
	13	discarded	discarded	discarded	discarded	discarded
	14	discarded	discarded	discarded	discarded	discarded
	16	✓	✓	n/a	n/a	n/a
	19	✓	✓	✓	✓	n/a
	20	✓	✓	✓	✓	✓
	21	✓	✓	✓	✓	✓
	27	✓	✓	✓	✓	✓
	31	✓	✓	✓	✓	✓
	42	✓	✓	✓	✓	✓
	64	✓	✓	✓	n/a	✓
mandibles	Week	Vial A	Vial B	Vial C	Vial D	Vial E
	1	✓	n/a	n/a	n/a	n/a
	2	✓	✓	✓	✓	✓
	3	✓	✓	✓	✓	✓
	4	✓	✓	✓	✓	✓
	5	✓	✓	✓	✓	✓
	12	✓	✓	✓	✓	✓
	13	discarded	discarded	discarded	discarded	discarded
	14	discarded	discarded	discarded	discarded	discarded
	16	✓	✓	n/a	n/a	n/a
	19	✓	✓	✓	✓	n/a
	20	✓	✓	✓	✓	✓
	21	✓	✓	✓	✓	✓
	27	✓	✓	✓	✓	✓
	31	✓	✓	✓	✓	✓
	42	✓	✓	✓	✓	✓
	64	✓	✓	✓	n/a	✓
appendage detail	Week	Vial A	Vial B	Vial C	Vial D	Vial E
	1	✓	n/a	n/a	n/a	n/a
	2	✓	✓	x	✓	✓
	3	✓	✓	x	✓	✓
	4	✓	✓	x	✓	✓
	5	✓	✓	x	✓	✓
	12	✓	✓	x	✓	✓
	13	discarded	discarded	discarded	discarded	discarded
	14	discarded	discarded	discarded	discarded	discarded
	16	✓	✓	n/a	n/a	n/a
	19	✓	✓	x	✓	n/a
	20	✓	✓	x	✓	✓
	21	✓	✓	x	✓	✓
	27	✓	✓	x	✓	✓
	31	✓	✓	x	✓	✓
	42	✓	✓	x	✓	✓
	64	x	✓	x	n/a	✓
		✓- observed	x- not observed

## Sheet: Carcass density
terminal bubble	Week	Vial A	Vial B	Vial C	Vial D	Vial E
	1	x	n/a	n/a	n/a	n/a
	2	x	x	x	✓	✓
	3	x	x	x	✓	✓
	4	x	x	x	✓	✓
	5	x	x	x	✓	✓
	12	x	x	x	✓	✓
	13	discarded	discarded	discarded	discarded	discarded
	14	discarded	discarded	discarded	discarded	discarded
	16	x	x	n/a	n/a	n/a
	19	x	x	x	✓	n/a
	20	x	x	x	✓	✓
	21	x	x	x	✓	✓
	27	x	x	x	✓	✓
	31	x	x	x	✓	✓
	42	x	x	x	✓	✓
	64	x	x	x	n/a	✓
cavity homogeneity	Week	Vial A	Vial B	Vial C	Vial D	Vial E
	1	x	n/a	n/a	n/a	n/a
	2	x	x	x	x	x
	3	x	x	x	x	x
	4	x	x	x	x	x
	5	x	x	x	x	x
	12	✓	x	✓	x	x
	13	discarded	discarded	discarded	discarded	discarded
	14	discarded	discarded	discarded	discarded	discarded
	16	✓	x	n/a	n/a	n/a
	19	✓	x	✓	x	n/a
	20	✓	x	✓	✓	x
	21	✓	x	✓	✓	x
	27	✓	x	✓	✓	x
	31	✓	x	✓	✓	x
	42	✓	✓	✓	✓	✓
	64	✓	✓	✓	n/a	✓
reduction in carcass density	Week	Vial A	Vial B	Vial C	Vial D	Vial E
	1	x	n/a	n/a	n/a	n/a
	2	x	x	x	x	x
	3	x	✓	x	x	✓
	4	x	✓	x	x	x
	5	✓	✓	x	x	✓
	12	✓	✓	✓	✓	✓
	13	discarded	discarded	discarded	discarded	discarded
	14	discarded	discarded	discarded	discarded	discarded
	16	✓	✓	n/a	n/a	n/a
	19	✓	✓	x	x	n/a
	20	✓	✓	x	✓	✓
	21	✓	✓	x	x	✓
	27	✓	x	✓	x	x
	31	x	✓	✓	x	x
	42	✓	✓	✓	✓	x
	64	✓	x	x	n/a	✓
cavity bubble	Week	Vial A	Vial B	Vial C	Vial D	Vial E
	1	✓	n/a	n/a	n/a	n/a
	2	✓	x	x	x	✓
	3	✓	x	x	x	✓
	4	✓	x	x	x	✓
	5	✓	x	x	x	✓
	12	✓	✓	x	✓	✓
	13	discarded	discarded	discarded	discarded	discarded
	14	discarded	discarded	discarded	discarded	discarded
	16	✓	✓	n/a	n/a	n/a
	19	✓	✓	x	✓	n/a
	20	✓	✓	x	x	✓
	21	✓	✓	x	x	✓
	27	✓	✓	x	x	✓
	31	✓	✓	x	x	✓
	42	✓	x	x	x	✓
	64	✓	x	x	n/a	x
		✓- observed	x- not observed

## Sheet: Sediment density
bubble homogeneity	Week	Vial A	Vial B	Vial C	Vial D	Vial E
	1	x	n/a	n/a	n/a	n/a
	2	x	x	x	x	x
	3	x	x	x	x	x
	4	x	x	x	x	x
	5	x	x	x	x	x
	12	✓	x	x	x	x
	13	discarded	discarded	discarded	discarded	discarded
	14	discarded	discarded	discarded	discarded	discarded
	16	✓	x	n/a	n/a	n/a
	19	✓	x	x	x	n/a
	20	✓	x	x	x	x
	21	✓	x	✓	x	x
	27	✓	✓	✓	✓	x
	31	✓	✓	✓	✓	✓
	42	x	✓	x	✓	✓
	64	✓	✓	✓	n/a	✓
compression of bubbles	Week	Vial A	Vial B	Vial C	Vial D	Vial E
	1	x	n/a	n/a	n/a	n/a
	2	x	x	x	x	x
	3	x	x	x	x	x
	4	x	x	x	x	x
	5	x	x	x	x	x
	12	x	x	x	x	x
	13	discarded	discarded	discarded	discarded	discarded
	14	discarded	discarded	discarded	discarded	discarded
	16	x	x	n/a	n/a	n/a
	19	x	x	x	✓	n/a
	20	x	x	x	✓	x
	21	x	x	x	✓	✓
	27	x	✓	x	✓	✓
	31	x	✓	x	✓	✓
	42	x	✓	x	✓	✓
	64	x	✓	x	n/a	✓
low density material	Week	Vial A	Vial B	Vial C	Vial D	Vial E
	1	x	n/a	n/a	n/a	n/a
	2	x	x	x	x	x
	3	x	x	x	x	x
	4	x	x	x	x	x
	5	x	x	x	x	x
	12	x	x	x	x	x
	13	discarded	discarded	discarded	discarded	discarded
	14	discarded	discarded	discarded	discarded	discarded
	16	✓	x	n/a	n/a	n/a
	19	✓	x	✓	x	n/a
	20	✓	x	✓	x	x
	21	✓	x	✓	x	x
	27	✓	x	✓	x	x
	31	x	x	✓	x	x
	42	x	x	x	x	x
	64	x	x	x	n/a	x
high density material	Week	Vial A	Vial B	Vial C	Vial D	Vial E
	1	✓	n/a	n/a	n/a	n/a
	2	✓	✓	x	✓	✓
	3	✓	✓	x	✓	✓
	4	✓	✓	✓	✓	✓
	5	✓	✓	✓	✓	✓
	12	✓	✓	✓	✓	✓
	13	discarded	discarded	discarded	discarded	discarded
	14	discarded	discarded	discarded	discarded	discarded
	16	✓	✓	n/a	n/a	n/a
	19	✓	✓	✓	✓	n/a
	20	✓	✓	✓	✓	✓
	21	✓	✓	✓	✓	✓
	27	✓	✓	✓	✓	✓
	31	✓	✓	x	✓	✓
	42	✓	✓	x	✓	✓
	64	✓	✓	x	n/a	✓
		✓- observed	x- not observed

## Sheet: Organic carbon raw data
Identifier 1	Identifier 2	Peak Nr Flash TCD	Rt Flash TCD	Ampl Flash TCD	rArea Flash TCD		Amt N	Amt C
L-glu JK	361	1	168.8	1637	74980		36.1
L-glu JK	361	2	272.8	16212	369960			148.01
L-glu JK	330	1	168.8	1515	72036		33
L-glu JK	330	2	273.8	14736	337101			135.3
L-glu JK	330
L-glu JK	335	1	169.9	1502	72307		33.5
L-glu JK	335	2	273.9	14785	338350			137.35
L-glu JK	335
USGS 41a	342	1	168.7	1572	73370		34.2
USGS 41a	342	2	272.7	15318	349480			140.22
USGS 40	358	1	168.7	1632	75111		35.8
USGS 40	358	2	272.7	15978	364805			146.78
USGS 40	358
Tyrosine	429	1	169.8	1592	74711		34.32
Tyrosine	429	2	271.8	27633	637041			257.4
MW decarb	53407	1	172.9	2118	81802
MW decarb	53407	2	273.9	37428	880884
MW decarb	55346	1	172.7	2179	82000
MW decarb	55346	2	274.7	37713	880131
MW decarb	49830	1	172.7	1976	78264
MW decarb	49830	2	274.7	32375	764803
L-glu JK	310	1	168.9	1452	70286		31
L-glu JK	310	2	272.9	14240	327134			127.1
L-glu JK	1023	1	167.8	4460	130161		102.3
L-glu JK	1023	2	268.8	44887	1036889			419.43
L-glu JK	752	1	167.8	3323	106873		75.2
L-glu JK	752	2	270.8	33376	767650			308.32

## Sheet: Organic carbon calculation
L-glu	Amt N	Amp TCD	Area TCD	Amt C	Amp TCD	Area TCD					N v amp									N v area
	36.1	1637	74980	148.01	16212	369960
	33	1515	72036	135.3	14736	337101
	33.5	1502	72307	137.35	14785	338350
	34.2	1572	73370	140.22	15318	349480
	35.8	1632	75111	146.78	15978	364805
Tyr	34.32	1592	74711	257.4	27633	637041
L-glu JK	31	1452	70286	127.1	14240	327134
	102.3	4460	130161	419.43	44887	1036889
	75.2	3323	106873	308.32	33376	767650
N v amp	slope	0.0234897		N v area	slope	0.00120465
	intercept	-2.60945			intercept	-54.2076
C v amp	slope	0.0094242		C v area	slope	0.000406242
	intercept	-4.24577			intercept	-2.19098
						By amp	By area	By amp	By area	By amp	By area
		N		C		Amt N ug	Amt N ug	Amt C ug	Amt C ug	C/N	C/N	%N in sed		%C in sed
MW decarb	53407	2118	81802	37428	880884	47.1417	44.3351	348.483	355.661	7.39224	8.0221	0.0882688	0.0830137	0.652505	0.665944
MW decarb	55346	2179	82000	37713	880131	48.5746	44.5737	351.169	355.355	7.22948	7.97231	0.0877653	0.0805364	0.634498	0.642061
MW decarb	49830	1976	78264	32375	764803	43.8062	40.0731	300.863	308.504	6.86804	7.69853	0.0879113	0.0804196	0.603778	0.619113
										C v amp										C v area
			C/N ave	7.53045
			std dev	0.450262
			%N ave	0.0846525
			std dev	0.0037665
			%C ave	0.636316
			std dev	0.0224983
